# Supplementary material for: Exosomes derived from stem cells from apical papilla promote craniofacial soft tissue regeneration by enhancing Cdc42-mediated vascularization
Source: PubMed Central journal article supplement (PMC7821694; doi:10.1186/s13287-021-02151-w), 2021-01-22
Supplement: 13287_2021_2151_MOESM1_ESM.pdf [file 13287_2021_2151_MOESM1_ESM.pdf]

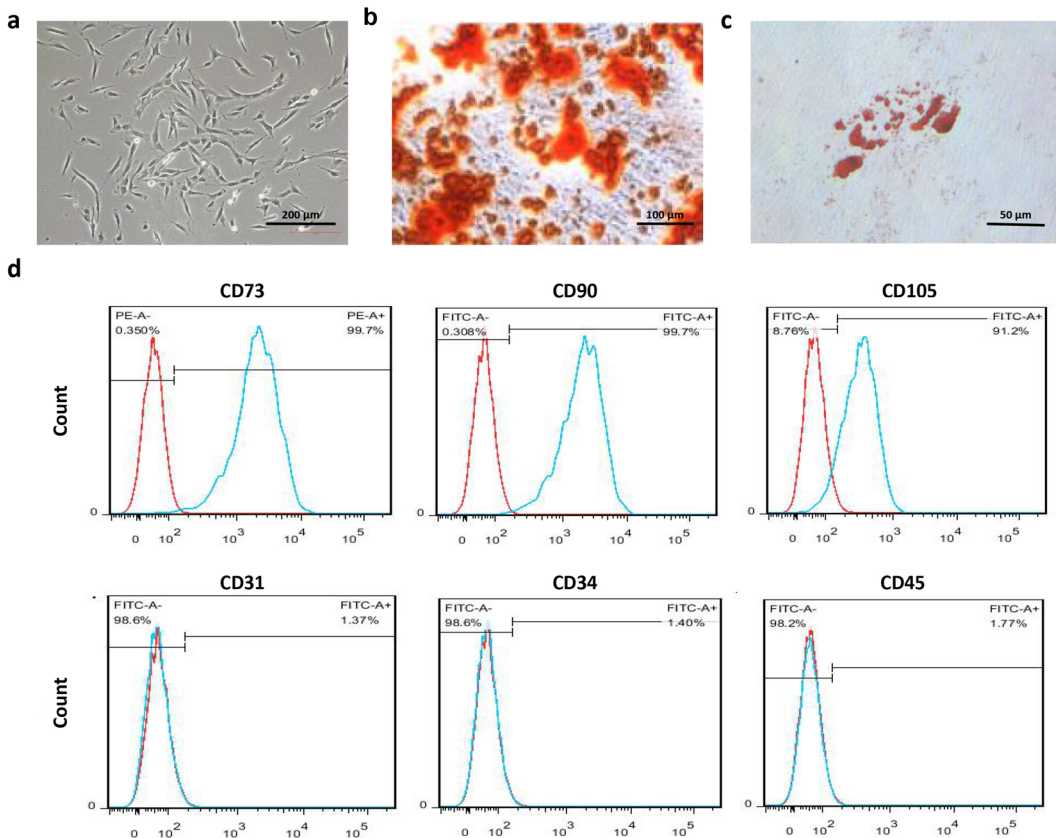

**Fig. S1** Characterization of SCAP. **a** Morphology of primary SCAP. Scale bar = 200  $\mu\text{m}$ . **b** Alizarin red S staining showed the formation of mineralized nodules. Scale bar = 100  $\mu\text{m}$ . **c** Oil red O staining showed lipid droplet formation. Scale bar = 50  $\mu\text{m}$ . **d** Flow cytometric analysis showed that SCAP were positive for CD73, CD90 and CD105 but negative for CD31, CD34 and CD45.
